# Supplementary material for: Exploring emotional expression recognition in aging adults using the Moving Window Technique
Source: PLoS One. 2018 Oct 18;13(10):e0205341. doi: 10.1371/journal.pone.0205341 (PMC6193651; doi:10.1371/journal.pone.0205341)
Supplement: S2 Table — Subject IDs are numeric, Age (1 = YA, 2 = OA). (CSV) [file pone.0205341.s002.csv]

ID	filter_LongRT	Age	Gender	angry_accuracy	angry_RT	angry_eyeL	angry_eyeR	angry_nose	angry_mouth	disgust_accuracy	disgust_RT	disgust_eyeL	disgust_eyeR	disgust_nose	disgust_mouth	fear_accuracy	fear_RT	fear_eyeL	fear_eyeR	fear_nose	fear_mouth	happy_accuracy	happy_RT	happy_eyeL	happy_eyeR	happy_nose	happy_mouth	filter_$
11	0	1	f	.9	2.093749	.1	0	.1	.8	1	2.248154	0	0	0	1	1	1.885228	0	0	0	1	1	1.684564	0	0	0	1	1
12	0	1	f	.9	1.838661	.1	0	.5	.4	.9	1.629522	0	0	.5	.5	1	1.933889	0	.1	.7	.2	1	2.282925	.2	.4	.1	.3	1
13	0	1	f	1	2.956509	.1	.1	.3	.5	1	2.480645	.1	0	0	.9	1	3.132014	.1	.1	.1	.7	1	2.243159	.1	0	0	.9	1
14	0	1	f	.9	2.156432	.2	.3	0	.5	1	2.326506	0	0	.2	.8	1	2.146144	0	.3	0	.7	1	1.896672	0	.3	.1	.6	1
15	0	1	f	1	3.200347	.2	.1	.1	.6	1	1.519596	.6	.1	.1	.2	1	1.490981	.8	0	.1	.1	1	1.476263	.5	.3	.2	0	1
16	0	1	f	1	3.418617	.2	.7	.1	0	.9	3.41158	0	.2	.5	.3	1	3.479756	.2	.4	.2	.2	1	3.220529	.2	.4	.2	.2	1
17	0	1	f	1	1.977259	.1	.3	.2	.4	1	1.76571	0	.4	.1	.5	1	1.587934	0	.2	.2	.6	1	1.465183	0	0	0	1	1
18	0	1	f	1	2.522319	.3	.3	.1	.3	.9	2.203213	.1	.1	0	.8	1	1.979944	.1	.1	.2	.6	1	1.458053	.1	0	.2	.7	1
19	0	1	f	1	1.477972	.2	.1	.6	.1	.8	1.396596	.1	0	.7	.2	.9	1.472718	.2	.1	.6	.1	1	1.494776	.2	0	.2	.6	1
20	0	1	f	1	2.410797	.3	.1	.5	.1	1	1.639613	.5	.1	.3	.1	1	1.81096	.3	0	.5	.2	1	1.602845	.5	.1	.3	.1	1
21	0	1	m	1	1.568453	.3	0	.5	.2	1	1.456914	.2	.1	.2	.5	1	1.73476	.1	0	.7	.2	1	1.259014	.2	.2	.6	0	1
22	0	1	m	1	3.026025	.2	.4	.2	.2	1	3.329945	.2	0	.6	.2	1	2.350905	.1	0	.3	.6	1	1.926548	0	.1	.5	.4	1
23	0	1	m	1	2.893557	.2	.6	0	.2	1	2.914433	.1	.1	0	.8	1	2.748006	0	.3	0	.7	1	2.494628	0	.2	0	.8	1
24	0	1	m	.8	2.198232	0	.2	.5	.3	1	1.925607	0	.3	.2	.5	.9	2.116573	.1	.2	.2	.5	1	1.390215	0	.3	0	.7	1
25	0	1	m	.9	4.584431	.3	.1	.3	.3	1	4.455932	.1	.1	.4	.4	.9	4.429662	.3	0	.6	.1	1	2.25781	.2	.3	.4	.1	1
26	0	1	m	.9	2.909704	.6	.3	.1	0	1	2.118571	.7	.1	.1	.1	1	1.799413	.9	0	.1	0	1	1.737763	.7	.2	0	.1	1
27	0	1	m	1	2.578937	0	.5	.2	.3	1	3.328894	.2	.3	0	.5	1	2.502163	.1	.1	0	.8	1	2.096895	.1	0	.1	.8	1
28	0	1	m	.9	4.000303	.1	.3	.4	.2	.9	5.004837	.1	.1	.6	.2	.9	5.801256	.4	.2	.3	.1	1	2.967233	.5	.1	.3	.1	1
29	0	1	m	1	2.079419	0	.3	.3	.4	.9	1.711401	.1	.3	.1	.5	1	1.745939	.2	0	0	.8	.9	1.445674	.1	.4	.1	.4	1
30	0	1	m	1	3.165907	.2	.4	.4	0	1	3.243839	.3	.2	.4	.1	1	3.516994	.2	.1	.5	.2	1	2.946489	.1	.4	.4	.1	1
52	0	1	f	1	4.166704	.1	.2	.1	.6	1	4.062512	0	.4	.2	.4	1	3.37371	.2	.3	.1	.4	1	2.748469	0	.5	0	.5	1
53	0	1	f	.8	1.970273	0	0	.2	.8	.9	1.771276	0	0	.1	.9	1	1.904247	.1	.2	0	.7	1	1.680989	0	0	.1	.9	1
111	0	1	f	.7	4.294441	.1	.3	.1	.5	.8	5.244737	.3	.3	.2	.2	1	3.360666	.2	.2	.2	.4	1	2.094942	.1	0	.2	.7	1
113	0	1	f	1	1.940205	.1	.2	0	.7	1	1.935715	0	.1	0	.9	1	1.748613	.2	.1	.2	.5	1	1.469514	.1	0	0	.9	1
114	0	1	f	1	2.061054	0	.2	.3	.5	1	2.745331	0	0	0	1	1	2.266103	.2	0	.3	.5	1	1.67943	.1	0	0	.9	1
115	0	1	f	.6	2.745507	.3	.4	.1	.2	1	2.248356	.1	.4	.3	.2	1	2.141726	.2	.6	.2	0	1	2.012309	.1	.5	.3	.1	1
116	0	1	f	.9	3.902429	.1	.5	.1	.3	1	2.961318	.2	.1	.1	.6	1	4.145229	.4	.3	.1	.2	1	1.695453	0	0	.1	.9	1
117	0	1	f	1	2.063531	.4	.1	.3	.2	.9	2.54086	.3	.1	.1	.5	1	1.916884	.4	.1	.3	.2	1	1.697446	.1	0	.5	.4	1
118	0	1	f	1	3.799281	.5	0	.3	.2	1	3.789382	.6	.1	.1	.2	1	3.243894	.6	0	.2	.2	1	2.194399	.1	.4	.3	.2	1
119	0	1	f	1	1.810895	0	0	.1	.9	1	1.599657	0	0	.1	.9	1	1.50978	.1	0	0	.9	.9	1.433198	0	0	0	1	1
120	0	1	f	.9	3.252286	.4	.3	.3	0	1	3.14226	.5	.3	.2	0	1	2.680361	.7	.1	.2	0	1	2.979882	.5	0	.2	.3	1
121	0	1	f	1	2.649004	.5	.3	.2	0	1	3.077171	.2	0	.2	.6	1	2.979765	.4	.2	0	.4	1	1.75426	.1	.4	.4	.1	1
220	0	1	m	.9	4.384516	.7	.1	.1	.1	1	4.053833	.2	.3	.2	.3	1	3.327194	.3	.5	.1	.1	1	1.909077	.4	.2	.2	.2	1
221	0	1	m	.7	2.550578	.1	.3	.2	.4	1	1.904002	.6	.1	.1	.2	1	1.988868	.4	.3	.1	.2	1	1.420066	.6	.1	.2	.1	1
222	0	1	m	1	3.805887	.2	.2	.3	.3	1	3.793128	.6	.3	.1	0	1	4.891577	.2	.3	.2	.3	1	3.490104	.3	.6	.1	0	1
223	0	1	m	.9	3.904257	0	0	.3	.7	1	3.362136	.1	.1	.2	.6	1	2.906555	.2	.1	.3	.4	.9	2.665191	0	.1	.2	.7	1
225	0	1	m	.7	7.506693	.5	.1	.4	0	1	3.614452	.1	.3	.6	0	1	4.916315	0	.2	.8	0	1	1.692747	.5	0	.4	.1	1
226	0	1	m	.9	2.947849	.4	.1	.2	.3	.5	3.939992	.3	.3	0	.4	.8	3.579679	.1	.4	.1	.4	.9	2.46579	.4	.2	.2	.2	1
227	0	1	m	.9	2.964719	0	.2	.5	.3	1	3.00472	0	.4	.3	.3	1	3.107282	0	0	.5	.5	1	2.679015	.2	.2	.1	.5	1
228	0	1	m	.8	3.958594	.3	.3	.1	.3	.8	4.115533	.3	.1	.3	.3	1	3.541504	.2	.1	.2	.5	1	2.489089	.3	.1	.4	.2	1
229	0	1	m	.9	3.558706	.1	.3	.4	.2	1	3.164223	.2	.1	.5	.2	1	3.260725	.2	.1	.1	.6	1	2.439401	0	.1	.3	.6	1
31	0	2	f	.9	3.632934	.5	.1	.1	.3	1	3.596405	.4	.2	.4	0	1	4.118444	.7	0	.2	.1	.9	2.603504	0	0	0	1	1
32	0	2	f	.9	7.473123	.1	0	.5	.4	.9	6.420081	.1	.1	0	.8	1	7.561106	.3	.1	.1	.5	1	4.37808	.1	.1	.1	.7	1
33	0	2	f	1	7.93649	.1	.3	.2	.4	.8	9.886663	.1	.3	.3	.3	1	9.321196	0	.3	.4	.3	.9	6.542871	.2	.5	0	.3	1
34	0	2	f	1	3.197632	.5	.3	.2	0	1	2.793494	.7	0	.1	.2	1	3.337531	.3	.3	.3	.1	1	2.060479	.3	.1	.1	.5	1
36	0	2	f	.9	4.057104	0	.1	.5	.4	1	5.618204	0	.1	.3	.6	1	4.33111	.1	0	.5	.4	1	1.985018	0	.3	.4	.3	1
37	0	2	f	.6	8.03935	.2	.1	.4	.3	1	6.220379	.3	.1	.1	.5	1	6.045344	.7	.1	.1	.1	1	5.869201	.3	.1	.3	.3	1
38	0	2	f	1	3.877743	.1	.4	.2	.3	.8	4.281333	.1	.4	.2	.3	1	3.684674	.7	.1	.2	0	1	2.904551	.5	0	.3	.2	1
39	0	2	f	.7	6.861482	0	0	.4	.6	.8	7.622479	.1	0	.5	.4	1	6.341814	.1	0	.6	.3	1	3.729637	0	0	.4	.6	1
41	0	2	m	1	3.219164	.2	0	.2	.6	1	3.662757	.1	0	.3	.6	1	3.237483	.1	0	.3	.6	1	2.825227	.2	0	.5	.3	1
42	0	2	m	.7	4.349907	.1	0	.2	.7	.7	4.733898	0	.1	.2	.7	.9	5.333846	0	.1	.4	.5	1	2.488609	0	.1	0	.9	1
43	0	2	m	.8	7.397834	.2	.2	.1	.5	.8	7.056675	0	.2	.5	.3	.9	7.026963	.2	.4	.2	.2	1	5.310453	.3	0	.1	.6	1
44	0	2	m	.9	5.299648	.2	.1	.1	.6	.8	4.429563	0	0	.5	.5	.7	6.408548	.3	0	.3	.4	1	3.362385	.2	.1	.1	.6	1
45	0	2	m	.8	4.364428	.2	0	.5	.3	1	3.576178	.5	0	.4	.1	1	3.621302	.4	.5	.1	0	1	2.843498	0	.3	.5	.2	1
46	0	2	m	1	9.267946	0	.2	.4	.4	.9	10.907125	0	.2	.1	.7	1	6.815686	.1	0	.3	.6	1	6.270218	.3	.1	.1	.5	1
47	0	2	m	1	3.076206	.5	0	.3	.2	.7	6.497677	.4	.1	.1	.4	1	4.927179	.7	.2	0	.1	1	2.861903	.1	.3	.3	.3	1
48	0	2	m	.8	7.966016	.1	.2	.7	0	1	8.241585	.5	0	.3	.2	1	9.115409	.4	.2	.2	.2	1	6.905512	.2	.2	.5	.1	1
49	0	2	m	1	4.118475	.4	0	.6	0	.5	6.210762	.2	.2	.3	.3	1	4.352566	.3	.2	.2	.3	1	2.524391	.2	.1	0	.7	1
51	0	2	m	.8	2.471119	.1	.1	.4	.4	.9	3.225689	.1	0	.7	.2	.9	2.229707	0	0	.4	.6	1	2.41106	0	0	.4	.6	1
54	0	2	m	1	3.789877	.2	0	.4	.4	1	3.026178	.1	0	0	.9	1	4.258376	.3	.1	.3	.3	.9	2.678612	.1	.3	.3	.3	1
330	0	2	f	1	6.264268	0	.1	.4	.5	.9	6.692945	.1	0	.3	.6	1	5.965667	0	0	.6	.4	1	4.213384	0	.1	.3	.6	1
331	0	2	f	1	5.493767	.4	0	.4	.2	1	3.492004	.1	0	.7	.2	1	5.474944	.5	0	.5	0	1	3.388624	0	.1	.7	.2	1
332	0	2	f	1	5.713889	.35	.05	.1	.5	.9	4.722844	.25	.05	.25	.45	1	4.831802	.25	.1	.25	.4	.95	3.104847	.1	.1	.25	.55	1
334	0	2	f	.9	4.034807	0	0	.4	.6	.8	5.082883	0	0	.5	.5	.9	4.929682	0	.1	.4	.5	.9	3.474778	0	0	.1	.9	1
335	0	2	f	1	4.748532	.1	.2	.6	.1	1	5.39394	.4	0	.4	.2	1	4.665858	.2	0	.5	.3	.9	3.582886	.1	0	.5	.4	1
336	0	2	f	.9	8.781241	.2	.4	.4	0	.8	9.822746	.1	0	.1	.8	1	8.200211	.1	0	.4	.5	1	4.228414	.8	0	0	.2	1
337	0	2	f	1	5.809751	.3	.1	.5	.1	.7	9.166748	.4	.2	.3	.1	1	7.008341	.4	.1	.4	.1	1	3.789115	0	0	.8	.2	1
338	0	2	f	1	5.805987	.2	.6	0	.2	.9	6.011446	0	0	.3	.7	.9	7.108154	.4	.1	.3	.2	1	4.081404	.4	0	.3	.3	1
339	0	2	f	.9	6.462292	0	.1	.1	.8	.9	5.722977	0	0	.1	.9	1	7.784091	.1	.1	.5	.3	1	4.517821	0	.1	.1	.8	1
340	0	2	f	.9	6.522944	0	.3	.4	.3	.6	8.318983	0	.2	.6	.2	1	5.944263	0	0	.3	.7	1	5.299091	.3	0	.6	.1	1
440	0	2	m	.8	4.758221	.2	.3	.4	.1	.9	6.048546	.1	.1	.4	.4	1	5.243947	.1	.6	.3	0	.9	3.872932	0	0	.8	.2	1
441	0	2	m	.8	3.79384	0	0	.1	.9	.7	3.800884	0	0	.2	.8	.9	3.722958	0	0	.1	.9	.9	2.902739	0	0	.2	.8	1
442	0	2	m	.8	5.040233	.2	.3	.2	.3	.8	5.449079	.4	.3	.2	.1	.6	7.12766	.1	.3	0	.6	1	3.435172	.1	0	0	.9	1
443	0	2	m	.7	5.866291	.1	.5	.3	.1	.9	7.028665	0	.3	.2	.5	.9	5.214558	.1	.1	.6	.2	1	3.993375	0	0	.6	.4	1
444	0	2	m	.6	7.093242	.2	0	.5	.3	.8	6.238623	0	0	.6	.4	1	6.828829	0	0	.8	.2	.9	5.074934	0	0	.5	.5	1
445	0	2	m	.9	3.684715	.3	0	.6	.1	.7	5.423745	.2	.1	.4	.3	1	3.831006	0	0	.9	.1	1	3.284	.1	.1	.2	.6	1
446	0	2	m	1	3.489741	.4	.1	.5	0	.9	7.282006	.4	0	.4	.2	.9	6.206651	.4	.1	.5	0	1	3.25802	.7	.1	.2	0	1
447	0	2	m	.9	3.351633	.1	.1	.2	.6	.7	3.451475	.1	0	.3	.6	.9	5.014397	.1	0	.5	.4	.9	2.447429	.2	.1	.3	.4	1
448	0	2	m	.8	7.423293	0	.1	.7	.2	.5	9.336528	0	0	.9	.1	1	6.54621	0	0	.9	.1	.8	10.491893	0	0	.7	.3	1
449	0	2	m	1	4.005713	.2	.4	.2	.2	1	6.072871	0	.1	.2	.7	.9	4.602844	0	.3	.1	.6	.9	2.449145	.4	0	.3	.3	1
450	0	2	m	.9	5.696723	0	.1	.2	.7	.9	5.193007	.3	.3	0	.4	.9	5.02582	0	.5	.2	.3	.8	3.385083	.1	0	.2	.7	1
